# Supplementary material
Source: Research Square preprint supplement (doi:10.21203/rs.3.rs-8863777/v1)
Supplement: Supplementary file 1 [file b96cf60f980666cf90cfc309.docx]

**Supporting information**

**Leveraging the Redox Shuttle Effect of TEMPO for the reactivation of Dead Zinc in Aqueous Zinc-Ion Batteries**

Qianhong Da a，Zhengze Dang a, Dan Liu a, Ziyi Kang a, Yunbo Zhang * a，and Peizhi Yang* a

*a School of Energy and Environment Sciences, Yunnan Normal University, Kunming, Yunnan, 650500, P. R. China.*

*Corresponding authors: E-mail: [zhangyunbo@ynnu.edu.cn](mailto:zhangyunbo@ynnu.edu.cn) (Yunbo Zhang), [pzhyang@hotmail.com](mailto:pzhyang@hotmail.com) (Peizhi Yang).

**
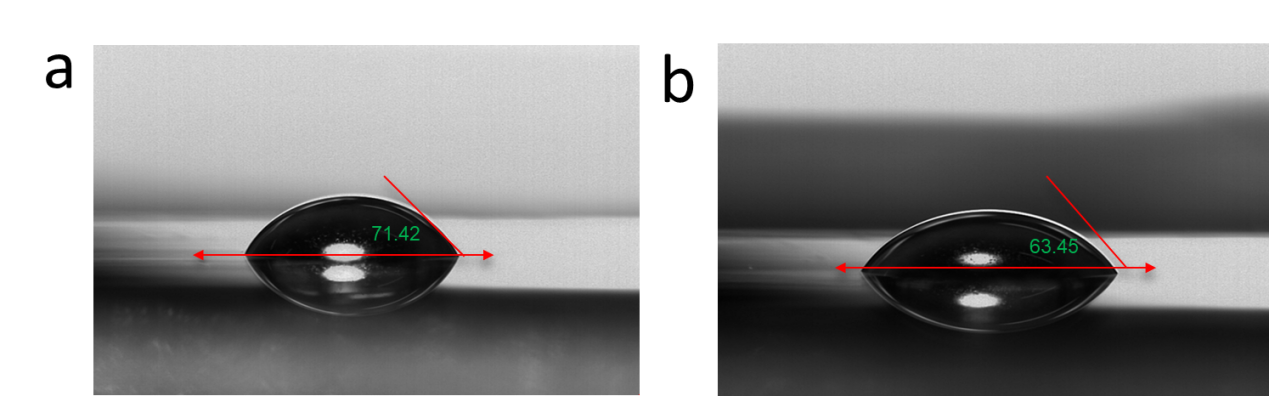
**

**Figure S1** a) Contact angle of the electrolyte without TEMPO. b) Contact angle of the electrolyte containing 10 Mm TEMPO.


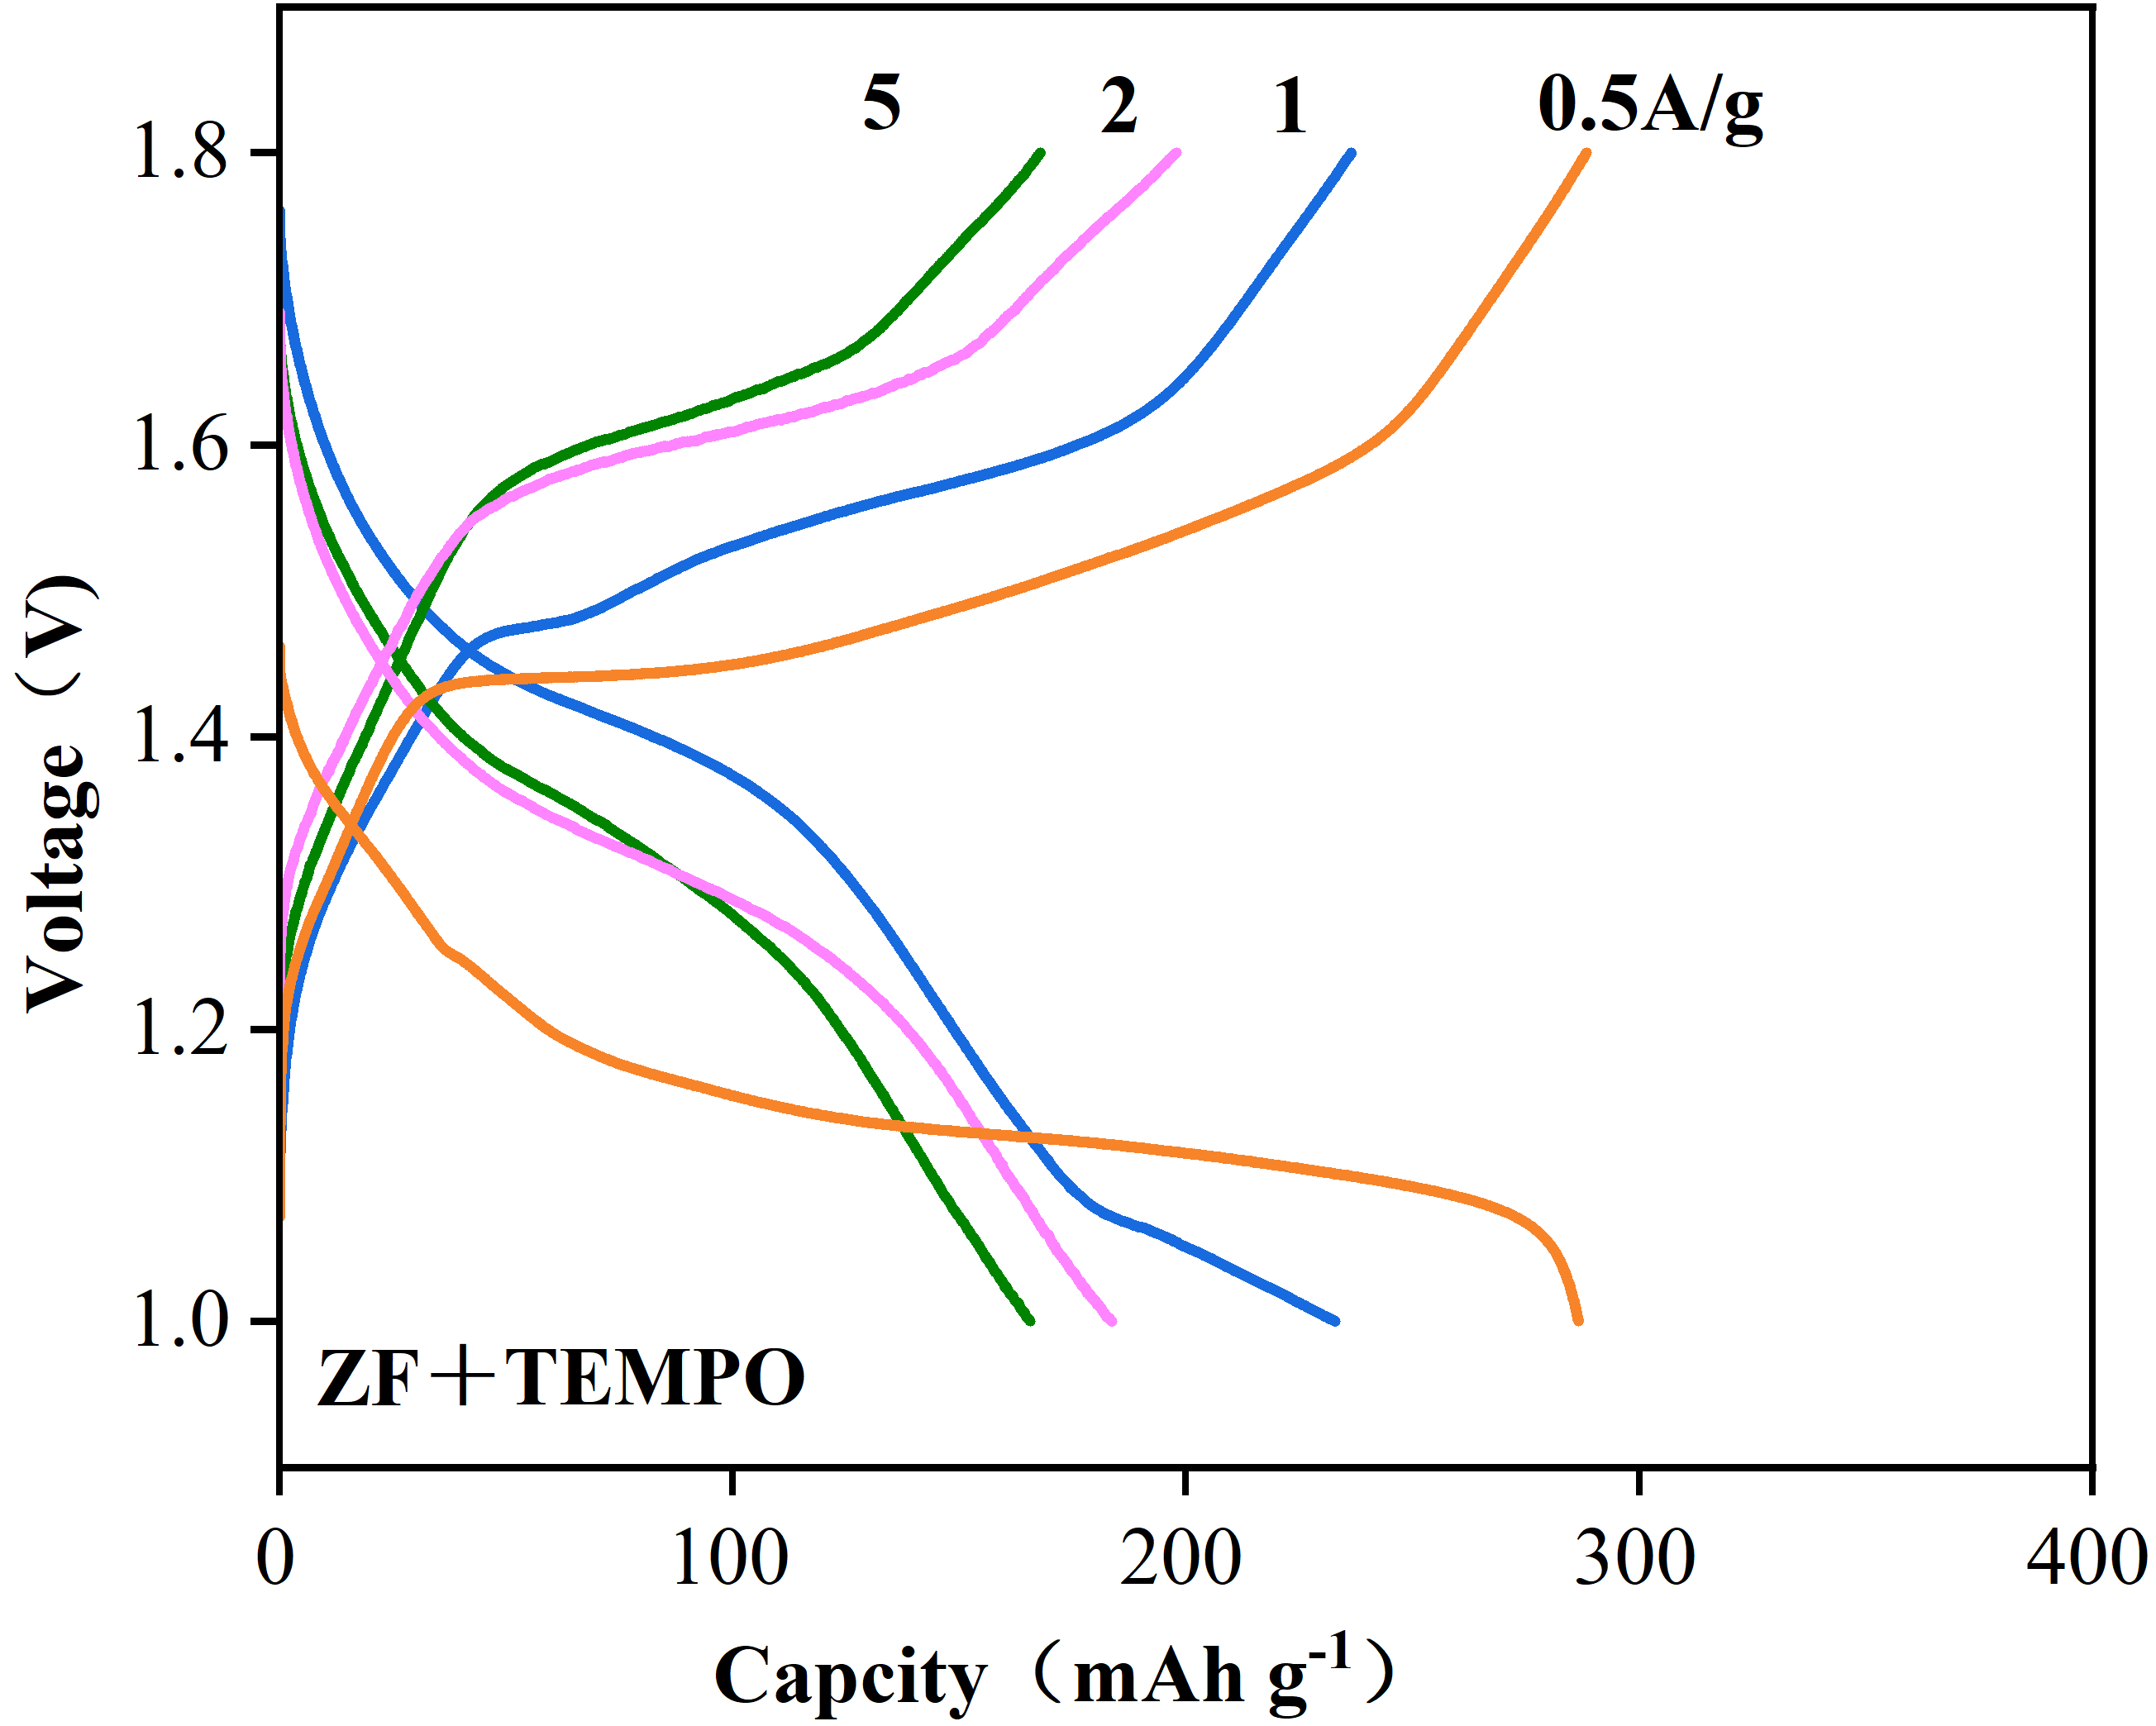


b


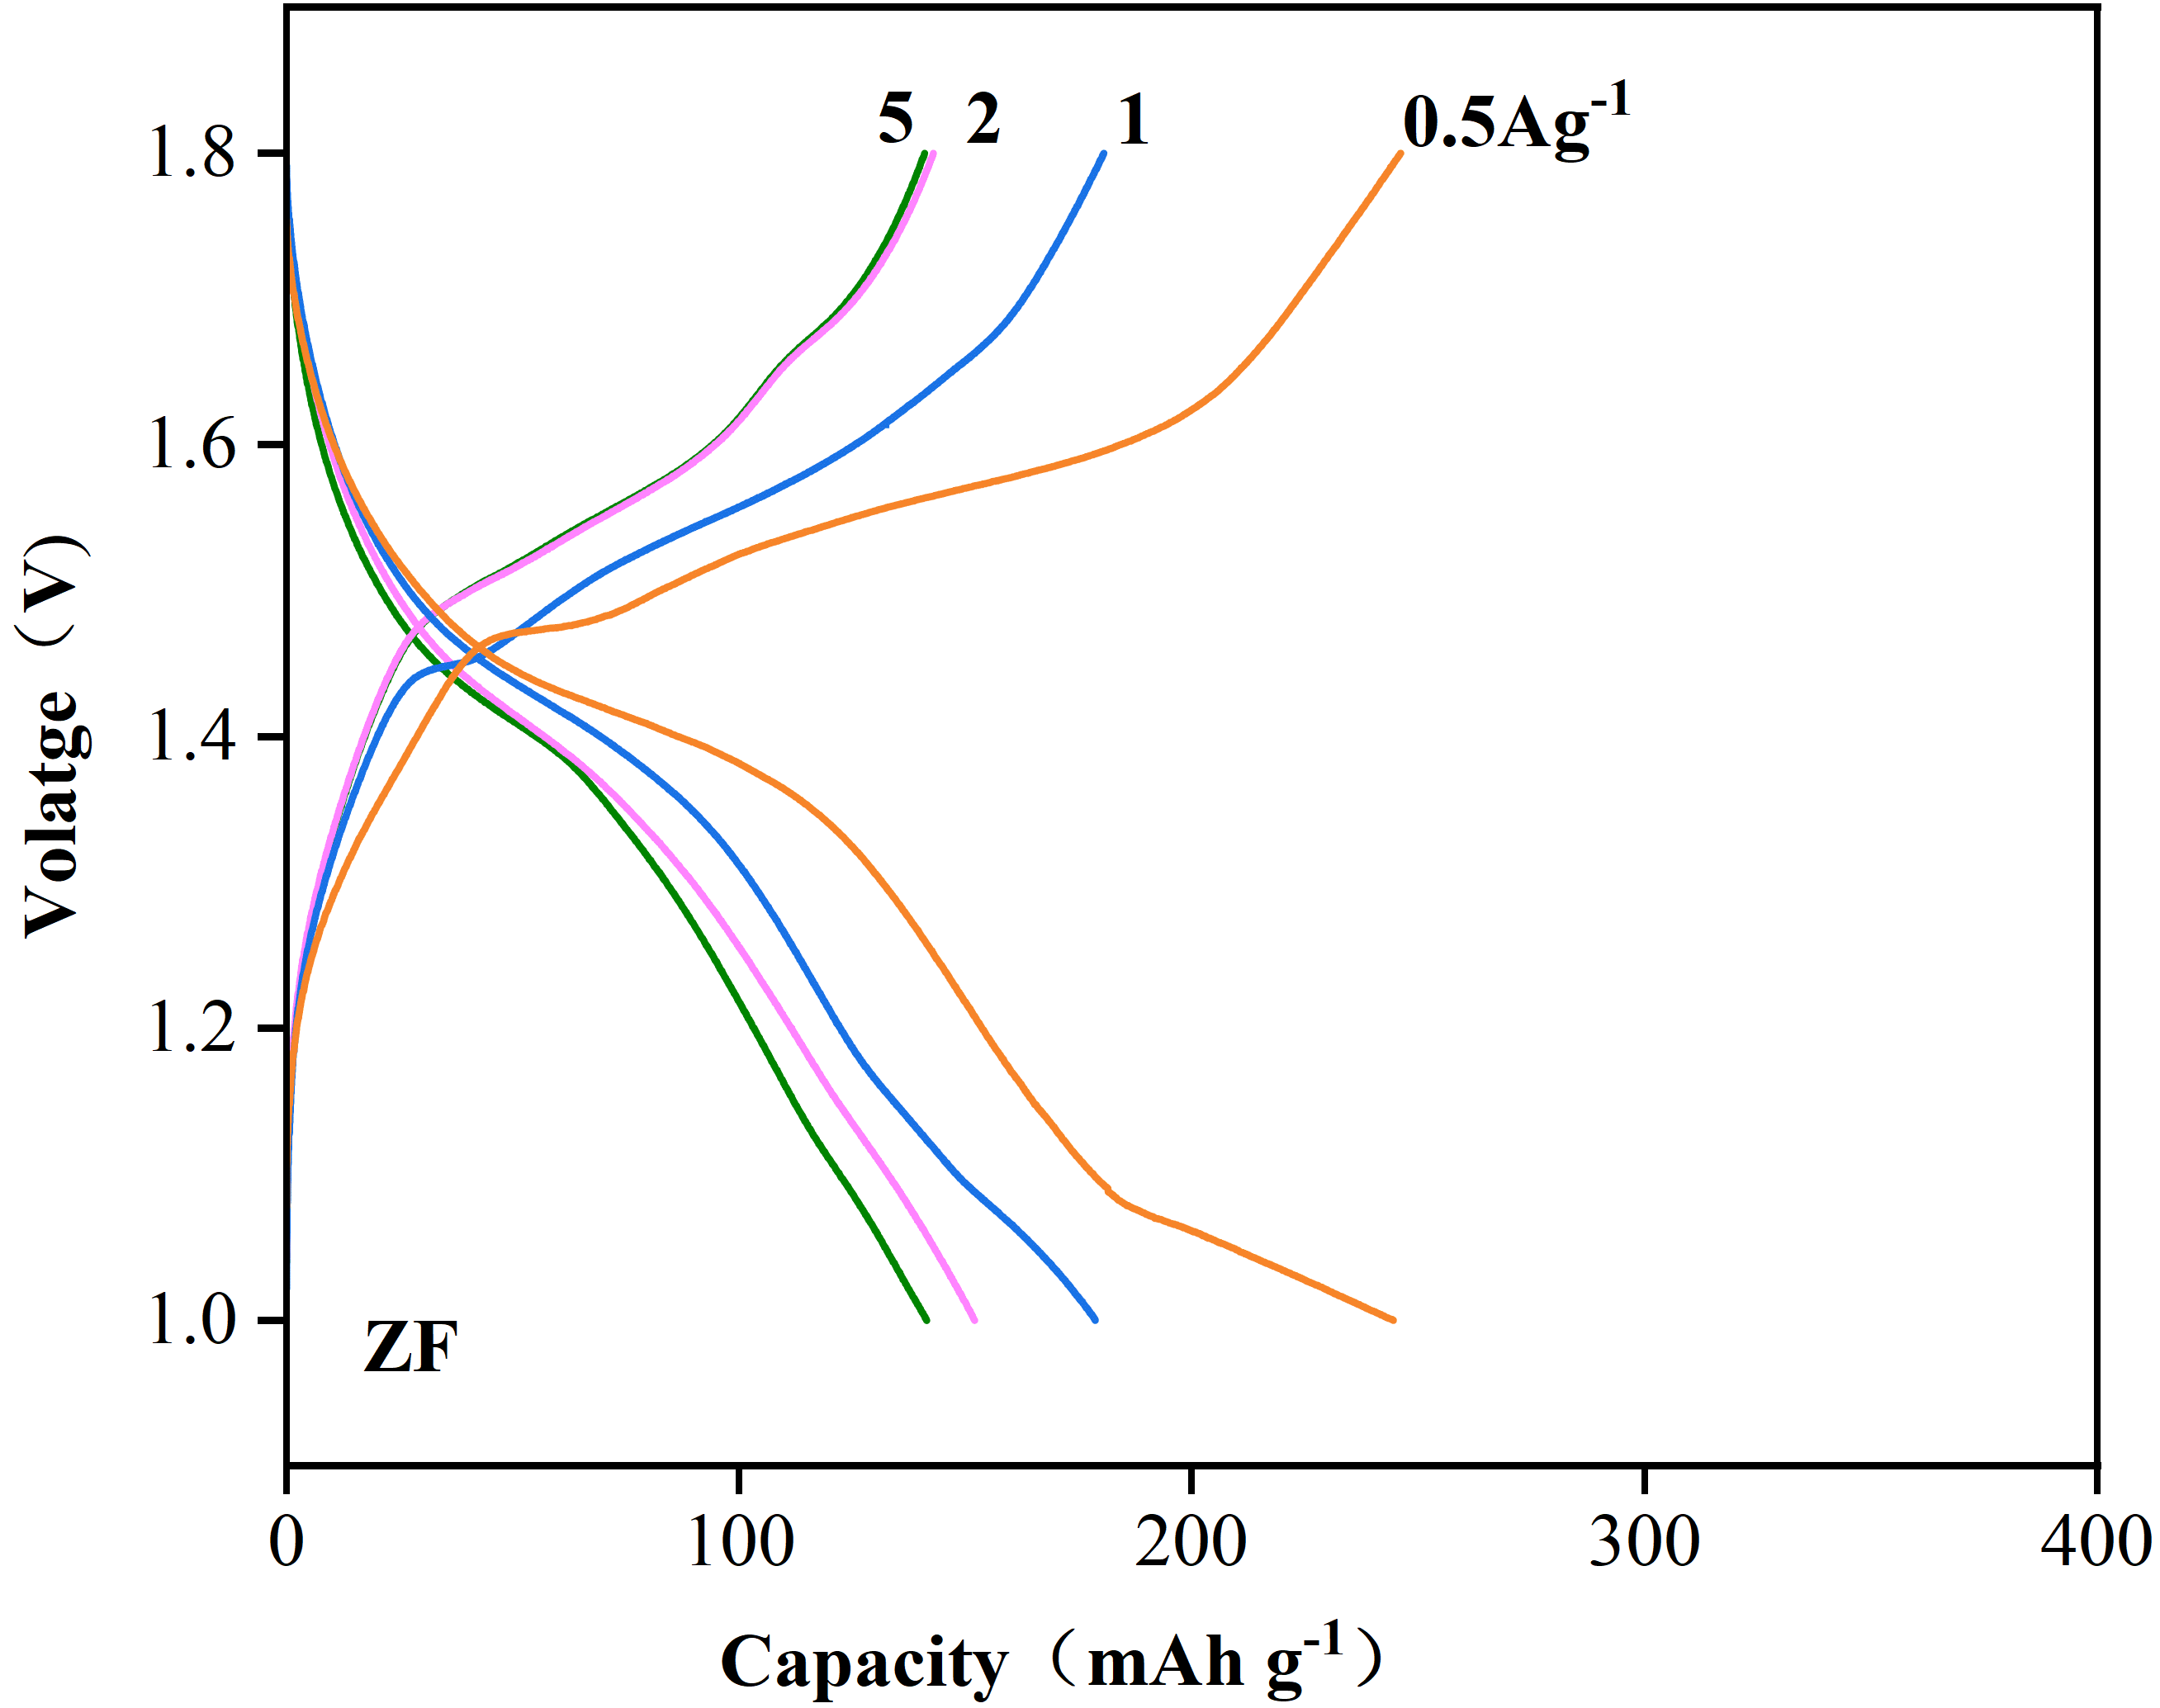


a

**Figure S2** Voltage-capacity curves of a) Zn(OTF)2 and b) TEMPO-modified electrolyte at different current densities.
